# Supplementary material
Source: PubMed Central journal article supplement (PMC2717305)
Supplement: mmc1.pdf [file mmc1.pdf]

Biophysical Journal, Volume 96

**Supporting Material**

**Structure and membrane interactions of the antibiotic peptide dermadistinctin K by multidimensional solution and oriented  $^{15}\text{N}$  and  $^{31}\text{P}$  solid-state NMR spectroscopy**

Rodrigo M. Verly, Cléria Mendonça de Moraes, Jarbas M. Resende, Christopher Aisenbrey, Marcelo Porto Bemquerer, Dorila Piló-Veloso, Ana Paula Valente, Fábio C. L. Almeida and Burkhard Bechinger

SUPPLEMENTARY INFORMATION

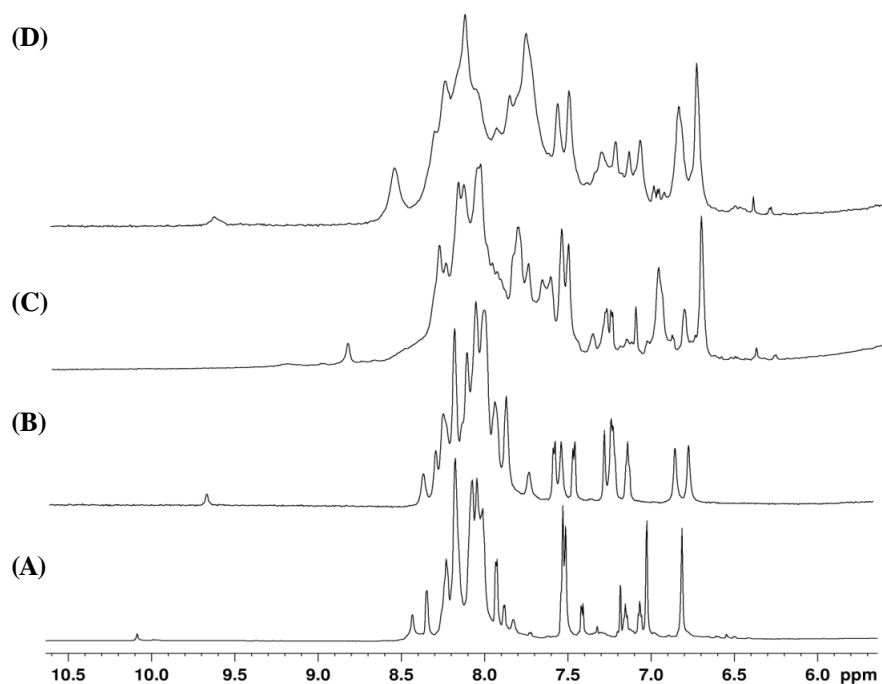

**FIGURE S1. Amide and aromatic region of the <sup>1</sup>H one-dimensional NMR spectra of 800 μM DD K at 25 °C.** (A) 20 mM sodium phosphate buffer at pH 7.0; (B) 50% TFE-d<sub>2</sub> in H<sub>2</sub>O; (C) in the presence of 400 mM DPC-d<sub>25</sub> or of (D) 400 mM SDS-d<sub>25</sub>. The NMR spectra were recorded on a Bruker AVANCE DRX spectrometer operating at a <sup>1</sup>H frequency of 800.04 MHz.

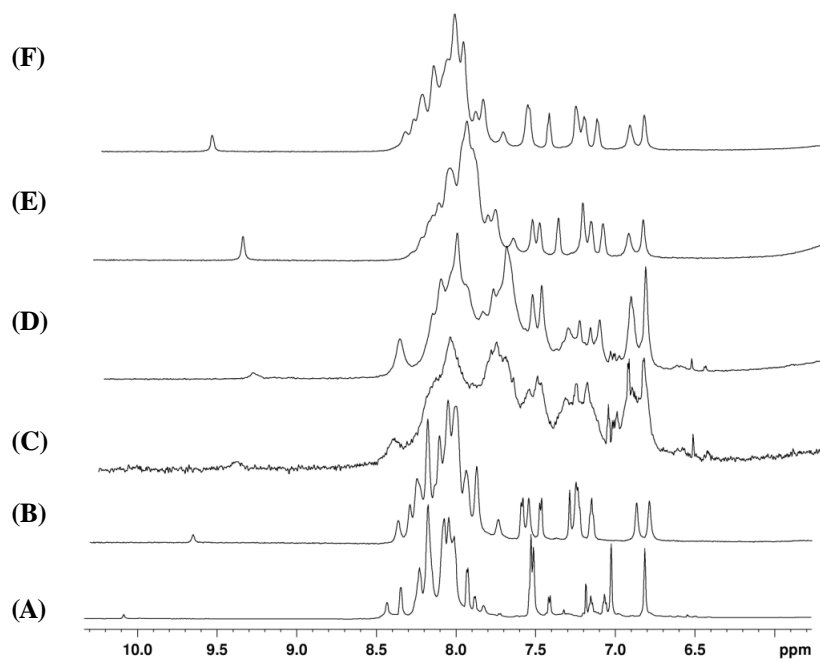

**FIGURE S2. Amide and aromatic region of the  $^1\text{H}$  one-dimensional NMR spectra of 2 mM DD K at 25 °C.** (A) in 20 mM sodium phosphate buffer at pH 7.0; (B) in 50% TFE- $\text{d}_2$  in  $\text{H}_2\text{O}$ ; (C) in the presence of 30 mM SDS- $\text{d}_{25}$ , (D) 60 mM SDS- $\text{d}_{25}$ , (E) 100 mM SDS- $\text{d}_{25}$  or (F) 400 mM SDS- $\text{d}_{25}$ . The NMR spectra were recorded on a Bruker AVANCE DRX spectrometer operating at a  $^1\text{H}$  frequency of 800.04 MHz.
